# Supplementary material for: Phentolamine Significantly Enhances Macrolide Antibiotic Antibacterial Activity against MDR Gram-Negative Bacteria
Source: MDPI journal article supplement (doi:10.3390/antibiotics12040760), 2023-04-14
Supplement: s1 [file s1]

## Supplementary File

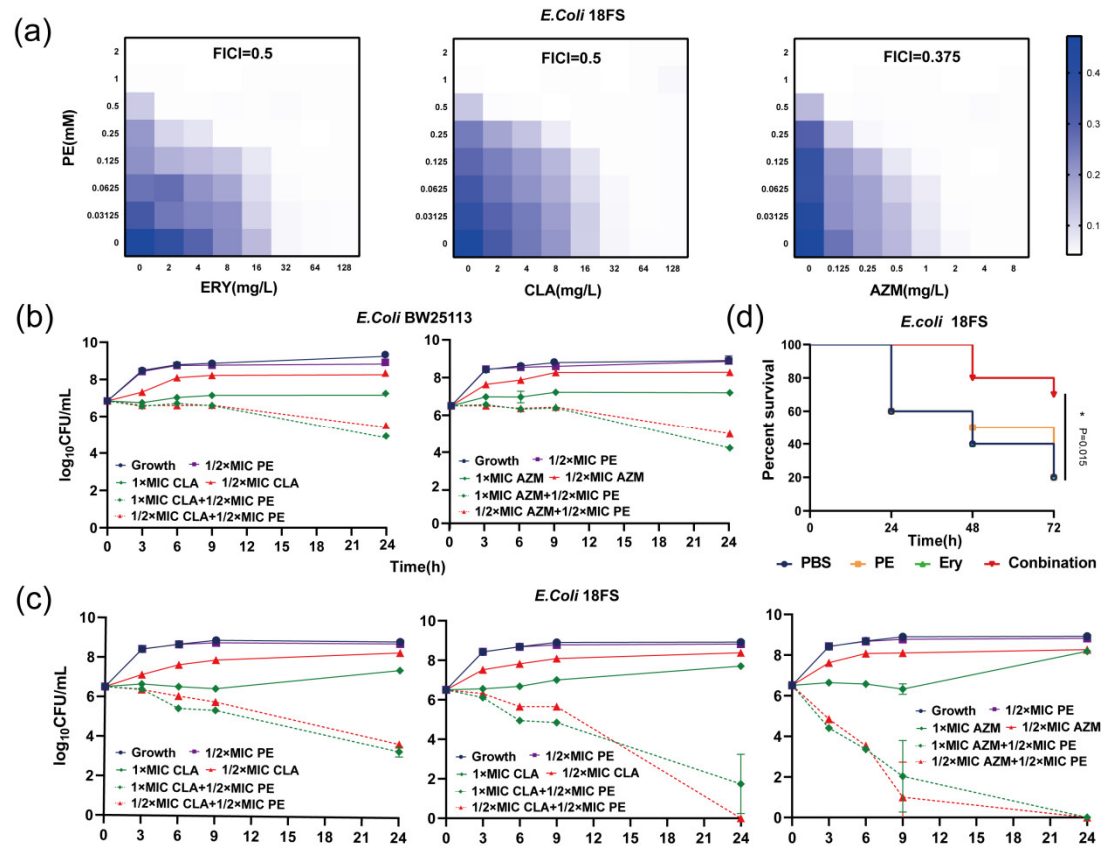

**Figure S1** (a) In vitro testing of phentolamine combined with 3 macrolide antibiotics (erythromycin, clarithromycin and azithromycin) indicated a synergistic action against *E. coli* strains with FICI values 0.5, 0.5 and 0.375. (b) The time–kill curves representing log<sub>10</sub> changes in bacterial burden of *E. coli* BW25113 over 24 h, following exposure to phentolamine (1/2×MIC) in the presence of increasing clarithromycin and azithromycin concentrations (1/4 –1/2×MIC) are shown. (c) The time–kill curves representing log<sub>10</sub> changes in bacterial burden of *E. coli* 18FS over 24 h, following exposure to phentolamine (1/2×MIC) in the presence of increasing erythromycin, clarithromycin and azithromycin concentrations (1/4 -1/2×MIC). (d) Phentolamine can improve the antibacterial activity of erythromycin against *E. coli* 18FS in vitro.

**Table S1.** Bacterial strains, plasmids, and primers used in this study.

| Strains, Plamids and Primers |                                                                        | Relevant Features and Use                                       |
|------------------------------|------------------------------------------------------------------------|-----------------------------------------------------------------|
| pCasKP-apr                   |                                                                        | Bacterial expression of Cas9 nuclease and $\lambda$ -Red system |
| PKD4                         |                                                                        | Bacterial expression; Gene knockout system                      |
| tolCF                        | 5-TACAGTTTGATCGCGCTAAATACTGCTTCACCACAAGGAATGCAAGCAGCATTACACGTCTTGAG-3  |                                                                 |
| tolCR                        | 5-TACGTTGCCTTACG TTCAGACGGGGCCGAAGCCCCGTCGTCGTCAGCTGACATGGGAATTAGCCA-3 |                                                                 |

**Table S2.** In vitro antimicrobial susceptibility profiles for test strain. MIC values of 11 antibiotics against *E.coli* 18FS. Gentamicin (GEN), Amikacin (AMK), Meropenem (MEM), Ceftaxime (CTX), Ceftazidime (CAZ), Cefoxitin (FOX), Ciprofloxacin (CIP), Florfenicol (FFC), Tetracycline (TET), Sulfamethoxazole/Trimethoprim (SMZ/TMP), Colistin (CS).

| Test Strain | Species        | MIC (mg/L) |     |     |      |      |      |     |     |     |             | CS |
|-------------|----------------|------------|-----|-----|------|------|------|-----|-----|-----|-------------|----|
|             |                | GEN        | AMK | MEM | CTX  | CAZ  | FOX  | CIP | FFC | TET | SMZ/<br>TMP |    |
| 18FS        | <i>E. coli</i> | 128        | 8   | 256 | >256 | >256 | >256 | 256 | 256 | 256 | >304/16     | 4  |
